# Supplementary material
Source: publisher figshare collection journal article supplement (https://aacr.figshare.com/articles/dataset/_/22489368)
Supplement: Supplementary file 1 [file 39940995]

# Supplementary Tables

# Supplementary Table 1

| Indication                      | Cell line          | Number of cells/well              | Culture conditions                                                                                                                                                                                                                                      |
|---------------------------------|--------------------|-----------------------------------|---------------------------------------------------------------------------------------------------------------------------------------------------------------------------------------------------------------------------------------------------------|
| <b>Multiple myeloma</b>         | KMS-11             | 20,000                            | RPMI 1640 medium with 300 mg/L (2 mM) L-glutamine adjusted to contain 2.0 g/L sodium bicarbonate; fetal bovine serum, 10%; P/S 1% (referred as 10% FBS RPMI 1640 complete medium)                                                                       |
|                                 | RPMI-8226          | 20,000                            | 10% FBS RPMI 1640 complete medium)                                                                                                                                                                                                                      |
|                                 | MOLP-8             | 20,000                            | RPMI 1640 medium with 300 mg/L (2 mM) L-glutamine adjusted to contain 2.0 g/L sodium bicarbonate; fetal bovine serum, 20%; P/S 1%                                                                                                                       |
|                                 | NCI-H929           | 20,000                            | RPMI 1640 medium with 300 mg/L (2 mM) L-glutamine adjusted to contain 2.0 g/L sodium bicarbonate, 2-mercaptoethanol to a final concentration of 0.05 mM; fetal bovine serum, 10%; P/S 1%                                                                |
|                                 | OPM-2              | 20,000                            | 10% FBS RPMI 1640 complete medium                                                                                                                                                                                                                       |
| <b>Myelogenous leukemia</b>     | THP-1              | 20,000                            | RPMI 1640 medium with 300 mg/L (2 mM) L-glutamine adjusted to contain 1.5 g/L sodium bicarbonate, 4.5 g/L glucose, 10 mM HEPES, and 1.0 mM sodium pyruvate; fetal bovine serum, 10%; P/S 1% (referred as 10% FBS 10 mM HEPES RPMI 1640 complete medium) |
|                                 | MV-4-11            | 25,000                            | ATCC complete growth medium: Iscove's modified Dulbecco's medium with 4 mM L-glutamine adjusted to contain 1.5 g/L sodium bicarbonate; fetal bovine serum, 10%; P/S 1% (referred as 10% IMDM complete medium)                                           |
|                                 | HEL                | 15,000                            | 10% FBS RPMI 1640 complete medium                                                                                                                                                                                                                       |
|                                 | TF-1a              | 15,000                            | 10% FBS 10mM HEPES RPMI 1640 complete medium                                                                                                                                                                                                            |
|                                 | KG-1               | 20,000                            | 10% FBS IMDM complete medium                                                                                                                                                                                                                            |
|                                 | ML-2               | 25,000                            | 10% FBS RPMI 1640 complete medium                                                                                                                                                                                                                       |
|                                 | MOLM-13            | 20,000                            | 10% FBS RPMI 1640 complete medium                                                                                                                                                                                                                       |
|                                 | HL-60              | 25,000                            | 10% FBS RPMI 1640 complete medium                                                                                                                                                                                                                       |
| K-562                           | 12,000             | 10% FBS RPMI 1640 complete medium |                                                                                                                                                                                                                                                         |
| <b>T-lymphoblastic leukemia</b> | KARPAS-299         | 20,000                            | 10% FBS RPMI 1640 complete medium                                                                                                                                                                                                                       |
|                                 | Jurkat, Clone E6-1 | 20,000                            | 10% FBS 10 mM HEPES RPMI 1640 complete medium                                                                                                                                                                                                           |
|                                 | MOLT-4             | 20,000                            | 10% FBS RPMI 1640 complete medium                                                                                                                                                                                                                       |
|                                 | RS4;11             | 25,000                            | 10% FBS RPMI 1640 complete medium                                                                                                                                                                                                                       |
| <b>Burkitt's lymphoma</b>       | Daudi              | 20,000                            | 10% FBS 10 mM HEPES RPMI 1640 complete medium                                                                                                                                                                                                           |
|                                 | Raji               | 20,000                            | 10% FBS RPMI 1640 complete medium                                                                                                                                                                                                                       |
|                                 | Ramos              | 20,000                            | 10% FBS RPMI 1640 complete medium                                                                                                                                                                                                                       |
| <b>B-cell lymphoma</b>          | ARH-77             | 20,000                            | 10% FBS RPMI 1640 complete medium                                                                                                                                                                                                                       |
|                                 | BC-3               | 20,000                            | 10% FBS RPMI 1640 complete medium                                                                                                                                                                                                                       |
|                                 | Z-138              | 25,000                            | 10% FBS IMDM complete medium                                                                                                                                                                                                                            |
|                                 | OCI-LY1            | 20,000                            | ATCC complete growth medium: Iscove's modified Dulbecco's medium with 4 mM L-glutamine adjusted to contain 1.5 g/L sodium bicarbonate; fetal bovine serum, 20%; P/S 1%                                                                                  |
|                                 | OCI-LY3            | 20,000                            | ATCC complete growth medium: Iscove's modified Dulbecco's medium with 4 mM L-glutamine adjusted to contain 1.5 g/L sodium bicarbonate, 2-mercaptoethanol to a final concentration of 0.05 mM; fetal bovine serum, 20%; P/S 1%                           |
|                                 | OCI-LY8            | 20,000                            | 10% FBS RPMI 1640 complete medium                                                                                                                                                                                                                       |
|                                 | OCI-LY19           | 20,000                            | α-MEM; fetal bovine serum, 20%; P/S 1%                                                                                                                                                                                                                  |
|                                 | SU-DHL-4           | 20,000                            | RPMI 1640 medium with 300 mg/L (2 mM) L-glutamine adjusted to contain 2.0 g/L sodium bicarbonate; fetal bovine serum, 20%; P/S 1%                                                                                                                       |
|                                 | Toledo             | 20,000                            |                                                                                                                                                                                                                                                         |
|                                 | DOHH-2             | 20,000                            | 10% FBS RPMI 1640 complete medium                                                                                                                                                                                                                       |

## Supplementary Table 2

**A**

| CLL patient<br>(P) | IC <sub>50</sub> (nM) |         |
|--------------------|-----------------------|---------|
|                    | APG-2575              | ABT-199 |
| P2                 | 25.89                 | 47.63   |
| P4                 | 20.63                 | 53.42   |
| P6                 | 16.28                 | 15.15   |
| P7                 | 8.48                  | 51.87   |

**B**

|           | IC <sub>50</sub> (nM) |         |
|-----------|-----------------------|---------|
|           | APG-2575              | ABT-199 |
| CLL PB301 | 38.25                 | 55.28   |
| CLL PB302 | 42.98                 | 62.17   |
| CLL PB303 | 44.15                 | 51.25   |
| CLL PB304 | 34.15                 | 42.98   |
| CLL PB305 | 47.51                 | 256.54  |
| CLL PB306 | 50.24                 | 195.48  |
| CLL PB307 | 39.77                 | 75.59   |
| CLL PB308 | 48.54                 | 98.17   |
| CLL PB309 | 95.54                 | 302.15  |
| CLL PB310 | 75.15                 | 305.28  |

## Supplementary Table 3

| <b>Cells/patients</b> | <b>APG-2575<br/>(IC<sub>50</sub>, mean ± SD, μM)</b> | <b>ABT-199<br/>(IC<sub>50</sub>, mean ± SD, μM)</b> |
|-----------------------|------------------------------------------------------|-----------------------------------------------------|
| KMS11                 | 2.26 ± 0.66                                          | 4.9 ± 0.88                                          |
| KMS12BM               | 3.89 ± 0.11                                          | 4.1 ± 0.24                                          |
| KMS12PE               | 3.92 ± 0.22                                          | 4.77 ± 0.33                                         |
| MM pt #1              | 1.92 ± 0.17                                          | 2.98 ± 0.42                                         |
| MM pt #2              | 1.11 ± 0.54                                          | 3.01 ± 0.14                                         |
| MM pt #3              | 1.33 ± 0.39                                          | 3.5 ± 0.37                                          |
| BCWM.1                | 2.58 ± 0.33                                          | 5.33 ± 0.17                                         |
| MWCL.1                | 3.77 ± 0.25                                          | 9.36 ± 0.42                                         |
| RPCL-WM.1             | 2.98 ± 0.27                                          | 6.45 ± 0.29                                         |
| WM pt #1              | 2.21 ± 0.65                                          | 2.57 ± 1.09                                         |
| WM pt #2              | 1.97 ± 0.25                                          | 2.14 ± 1.54                                         |
| WM pt #3              | 2.49 ± 0.48                                          | 2.22 ± 1.69                                         |

# Supplementary Table 4

A

| Cell line          | IC <sub>50</sub> (μM), Mean ± SD, n = 2 |                 |
|--------------------|-----------------------------------------|-----------------|
|                    | APG-2575                                | ABT-199         |
| Raji               | 14.85 ± 5.713                           | 16.28 ± 7.396   |
| BC-3               | 12.007 ± 4.884                          | 16.735 ± 3.401  |
| Z-138              | 11.24 ± 0.679                           | 6.484 ± 0.805   |
| MOLP-8             | 10.945 ± 0.134                          | 18.49 ± 1.287   |
| ARH-77             | 10.715 ± 2.228                          | 13.03 ± 3.267   |
| KARPAS-299         | 10.385 ± 0.163                          | 12.63 ± 3.041   |
| Ramos              | 9.993 ± 3.517                           | 10.051 ± 4.949  |
| HEL                | 9.491 ± 0.946                           | 10.129 ± 2.250  |
| Daudi              | 8.176 ± 0.867                           | 4.75 ± 0.194    |
| Jurkat, Clone E6-1 | 7.991 ± 2.330                           | 9.999 ± 7.483   |
| NCI-H929           | 5.323 ± 0.971                           | 6.213 ± 1.240   |
| K-562              | 4.76 ± 1.093                            | 0.299 ± 0.0007  |
| OCI-LY3            | 4.374 ± 0.626                           | 6.848 ± 2.815   |
| TF-1a              | 3.549 ± 1.082                           | 5.707 ± 1.820   |
| OPM-2              | 3.221 ± 0.099                           | 2.410 ± 0.634   |
| MOLT-4             | 3.082 ± 0.579                           | 4.105 ± 0.904   |
| KMS-11             | 2.253 ± 1.146                           | 1.406 ± 0.238   |
| SU-DHL-4           | 1.446 ± 0.476                           | 1.489 ± 0.628   |
| THP-1              | 0.405 ± 0.198                           | 0.722 ± 0.319   |
| ML-2               | 0.123 ± 0.088                           | 0.096 ± 0.120   |
| KG-1               | 0.059 ± 0.044                           | 0.050 ± 0.029   |
| Toledo             | 0.049 ± 0.005                           | 0.075 ± 0.011   |
| HL-60              | 0.027 ± 0.015                           | 0.025 ± 0.004   |
| OCI-LY1            | 0.023 ± 0.009                           | 0.036 ± 0.008   |
| OCI-LY19           | 0.011 ± 0.001                           | 0.0006 ± 0.0006 |
| RS4;11             | 0.009 ± 0.00071                         | 0.012 ± 0.006   |
| OCI-LY8            | 0.006 ± 0.002                           | 0.011 ± 0.005   |
| DOHH-2             | 0.004 ± 0.001                           | 0.005 ± 0.002   |
| MV-4-11            | 0.003 ± 0                               | 0.004 ± 0.001   |
| MOLM-13            | 0.002 ± 0                               | 0.003 ± 0.001   |

B

| Cancer type                                | Cell line          | IC <sub>50</sub> (μM), Mean ± SD, n = 2 |                 |
|--------------------------------------------|--------------------|-----------------------------------------|-----------------|
|                                            |                    | APG-2575                                | ABT-199         |
| Myeloma                                    | KMS-11             | 2.253 ± 1.146                           | 1.406 ± 0.238   |
|                                            | MOLP-8             | 10.945 ± 0.134                          | 18.49 ± 1.287   |
|                                            | NCI-H929           | 5.323 ± 0.971                           | 6.213 ± 1.240   |
|                                            | OPM-2              | 3.221 ± 0.099                           | 2.410 ± 0.634   |
| Acute monocytic leukemia                   | THP-1              | 0.405 ± 0.198                           | 0.722 ± 0.319   |
| Biphenotypic B myelomonocytic leukemia     | MV-4-11            | 0.003 ± 0                               | 0.004 ± 0.001   |
| Erythroleukemia                            | HEL                | 9.491 ± 0.946                           | 10.129 ± 2.250  |
|                                            | TF-1a              | 3.549 ± 1.082                           | 5.707 ± 1.820   |
| Acute myelogenous leukemia (AML)           | KG-1               | 0.059 ± 0.044                           | 0.050 ± 0.029   |
|                                            | ML-2               | 0.123 ± 0.088                           | 0.096 ± 0.120   |
|                                            | MOLM-13            | 0.002 ± 0                               | 0.003 ± 0.001   |
| Acute promyelocytic B-cell leukemia        | HL-60              | 0.027 ± 0.015                           | 0.025 ± 0.004   |
| Chronic myelogenous leukemia (CML)         | K-562              | 4.76 ± 1.093                            | 0.299 ± 0.0007  |
| T lymphoblastic leukemia                   | KARPAS-299         | 10.385 ± 0.163                          | 12.63 ± 3.041   |
| T cell acute lymphoblastic leukemia (ALL)  | Jurkat, Clone E6-1 | 7.991 ± 2.330                           | 9.999 ± 7.483   |
|                                            | MOLT-4             | 3.082 ± 0.579                           | 4.105 ± 0.904   |
|                                            | RS4;11             | 0.009 ± 0.00071                         | 0.012 ± 0.006   |
|                                            | Daudi              | 8.176 ± 0.867                           | 4.75 ± 0.194    |
| Burkitt's lymphoma                         | Raji               | 14.85 ± 5.713                           | 16.28 ± 7.396   |
|                                            | Ramos              | 9.993 ± 3.517                           | 10.051 ± 4.949  |
|                                            | ARH-77             | 10.715 ± 2.228                          | 13.03 ± 3.267   |
| B lymphoma                                 | BC-3               | 12.007 ± 4.884                          | 16.735 ± 3.401  |
| Human mantle cell lymphoma (MCL) cell line | Z-138              | 11.24 ± 0.679                           | 6.484 ± 0.805   |
| Diffuse large B cell lymphoma, DLBCL, NHL  | OCI-LY1            | 0.023 ± 0.009                           | 0.036 ± 0.008   |
|                                            | OCI-LY3            | 4.374 ± 0.626                           | 6.848 ± 2.815   |
|                                            | OCI-LY8            | 0.006 ± 0.002                           | 0.011 ± 0.005   |
|                                            | OCI-LY19           | 0.011 ± 0.001                           | 0.0006 ± 0.0006 |
|                                            | SU-DHL-4           | 1.446 ± 0.476                           | 1.489 ± 0.628   |
|                                            | Toledo             | 0.049 ± 0.005                           | 0.075 ± 0.011   |
| Follicular lymphoma, NHL                   | DOHH-2             | 0.004 ± 0.001                           | 0.005 ± 0.002   |

## Supplementary Table 5

### PK-dose correlation in RS4;11 mouse xenografts

| Plasma                | Units    | APG-2575   |          |           | ABT-199  |
|-----------------------|----------|------------|----------|-----------|----------|
|                       |          | 6.25 mg/kg | 25 mg/kg | 100 mg/kg | 25 mg/kg |
| C <sub>max</sub>      | ng/mL    | 1,060.7    | 3,353.3  | 7,803.3   | 2,506.7  |
| T <sub>max</sub>      | hr       | 2.0        | 1.0      | 4.0       | 2.0      |
| T <sub>1/2</sub>      | hr       | 5.2        | 5.8      | 6.0       | 6.3      |
| AUC <sub>0-last</sub> | hr•ng/mL | 9,825.4    | 3,6615.6 | 12,3401.2 | 30,006.3 |
| AUC <sub>0-inf</sub>  | hr•ng/mL | 9,849.3    | 3,6727.0 | 12,3437.4 | 30,029.1 |

  

| Tumor                 | Units   | APG-2575   |          |           | ABT-199  |
|-----------------------|---------|------------|----------|-----------|----------|
|                       |         | 6.25 mg/kg | 25 mg/kg | 100 mg/kg | 25 mg/kg |
| C <sub>max</sub>      | ng/g    | 134.7      | 534.0    | 1,175.5   | 368.0    |
| T <sub>max</sub>      | hr      | 4.0        | 8.0      | 4.0       | 4.0      |
| T <sub>1/2</sub>      | hr      | 48.1       | 29.8     | 13.2      | 18.1     |
| AUC <sub>0-last</sub> | hr•ng/g | 7,224.6    | 18,392.0 | 50,633.2  | 12,279.0 |
| AUC <sub>0-inf</sub>  | hr•ng/g | 7,974.7    | 18,752.6 | 50,999.5  | 13,352.3 |

## Supplementary Table 6

**A**

### Changes in hematology parameters in APG-2575-treated mice

| Dose (mg/kg) | Gender | RBC (E6/ $\mu$ L) | HGB (g/dL)       | HCT (%)          | MCH (pg)         | MCHC (g/dL)      | WBC (E3/ $\mu$ L) | LYM (E3/ $\mu$ L) |
|--------------|--------|-------------------|------------------|------------------|------------------|------------------|-------------------|-------------------|
| 0            | M      | 8.51 $\pm$ 0.377  | 13.7 $\pm$ 0.22  | 46.5 $\pm$ 1.78  | 16.1 $\pm$ 0.55  | 29.5 $\pm$ 0.81  | 2.89 $\pm$ 0.908  | 2.19 $\pm$ 0.757  |
|              | F      | 8.64 $\pm$ 0.121  | 14.2 $\pm$ 0.34  | 48.1 $\pm$ 1.09  | 16.5 $\pm$ 0.33  | 29.6 $\pm$ 0.68  | 4.35 $\pm$ 0.908  | 3.43 $\pm$ 0.798  |
| 100          | M      | 8.44 $\pm$ 0.827  | 13.2 $\pm$ 1.05  | 44.3 $\pm$ 3.18  | 15.6 $\pm$ 0.34  | 29.7 $\pm$ 0.33  | 1.52 $\pm$ 0.63   | 1.04 $\pm$ 0.499  |
|              | F      | 8.86 $\pm$ 0.673  | 13.6 $\pm$ 0.83  | 48.5 $\pm$ 3.25  | 15.4 $\pm$ 0.48* | 28.1 $\pm$ 0.61* | 1.89 $\pm$ 0.751* | 1.10 $\pm$ 0.569* |
| 300          | M      | 8.34 $\pm$ 0.527  | 12.6 $\pm$ 0.64  | 45.0 $\pm$ 1.93  | 15.1 $\pm$ 0.36* | 27.9 $\pm$ 0.54* | 1.76 $\pm$ 1.754  | 0.58 $\pm$ 0.143* |
|              | F      | 8.55 $\pm$ 0.427  | 13.1 $\pm$ 0.44* | 46.0 $\pm$ 1.41  | 15.4 $\pm$ 0.49* | 28.6 $\pm$ 0.28* | 1.59 $\pm$ 0.768* | 0.89 $\pm$ 0.527* |
| 1,000        | M      | 8.00 $\pm$ 0.93   | 11.2 $\pm$ 1.00* | 40.2 $\pm$ 2.38* | 14.1 $\pm$ 0.61* | 27.8 $\pm$ 0.98* | 1.29 $\pm$ 0.239  | 0.56 $\pm$ 0.178* |
|              | F      | 7.67 $\pm$ 0.528* | 11.2 $\pm$ 0.73* | 40.7 $\pm$ 2.38* | 14.6 $\pm$ 0.31* | 27.5 $\pm$ 0.23* | 1.15 $\pm$ 0.393* | 0.53 $\pm$ 0.157* |

**B**

### Changes in bone marrow differential in APG-2575-treated mice

| Dose  | Gender | Metarubricyte    | Erythroid       | Lymphocyte       |
|-------|--------|------------------|-----------------|------------------|
| 0     | M      | 68.0 $\pm$ 16.9  | 107 $\pm$ 24.9  | 103 $\pm$ 27.4   |
|       | F      | 97.0 $\pm$ 10.4  | 130 $\pm$ 16.6  | 103 $\pm$ 15.4   |
| 100   | M      | 87.0 $\pm$ 17.8  | 132 $\pm$ 28.7  | 99.0 $\pm$ 18.0  |
|       | F      | 100 $\pm$ 14.6   | 139 $\pm$ 16.5  | 96.0 $\pm$ 21.8  |
| 300   | M      | 91.0 $\pm$ 13.9* | 138 $\pm$ 28.7  | 93.0 $\pm$ 22.1  |
|       | F      | 106 $\pm$ 19.5   | 147 $\pm$ 24.5  | 112 $\pm$ 20.3   |
| 1,000 | M      | 106 $\pm$ 27.8*  | 150 $\pm$ 34.8* | 74.0 $\pm$ 22.8* |
|       | F      | 118 $\pm$ 17.9*  | 148 $\pm$ 22.6  | 97.0 $\pm$ 11.4  |
